# Supplementary material for: Characterization of Cronartium ribicola dsRNAs reveals novel members of the family Totiviridae and viral association with fungal virulence
Source: Virol J. 2019 Oct 17;16:118. doi: 10.1186/s12985-019-1226-5 (PMC6796417; doi:10.1186/s12985-019-1226-5)
Supplement: Supplementary file 5 — Additional file 5: Table S1. Cronartium ribicola samples collected in the present study. Table S2. Contigs of the Cronartium ribicola transcriptome with significant homologies to Totiviruses revealed by Blastx search. Table S3. Oligonucleotide sequences designed for PCR. Table S4. Open reading frames (ORFs) identified in the C. ribicola viral full-length genomes. Table S5. CDD search of putative C. ribicola Totivirus dsRNA genomes. Table S6. Pfam search of putative C. ribicola Totivirus dsRNA genomes. Table S7. Amino acid sequence identities among putative CrTV proteins and other members of the family Totiviridae. [file 12985_2019_1226_MOESM5_ESM.xlsx]

## Sheet: Tab-S1-samples
Table S1: Cronartium ribicola collected in the present study
Sample ID	Stage	Pinus host (a)	Origin	Pathotype	Year collected	qRT-PCR	RNA-seq	dsRNA-detection	cDNA cloning
BC6	Aeciospores	WWP (cr2/cr2)	BC-Ladysmith	avcr2	April-2013	Yes	Yes	Yes	n/a
BC20	Aeciospores	WWP (cr2/cr2)	BC-Coombs	avcr2	April-2013	Yes	Yes	Yes	n/a
BC28	Aeciospores	WWP (cr2/cr2)	BC-Shawnigan	avcr2	April-2013	Yes	Yes	Yes	n/a
U3	Urediniospores	Ribes	BC-Coombs	avcr2	July-2013	Yes	Yes	Yes	Yes (CrTV1-CrTV4)
U48	Urediniospores	Ribes	BC-Coombs	avcr2	July-2013	Yes	Yes	Yes	n/a
Ua2	Urediniospores	Ribes	BC-Coombs	avcr2	July-2013	Yes	Yes	Yes	Yes (CrTV4-CrTV5)
OR4	Aeciospores	WWP (Cr2/-)	OR-Tyrrell	vcr2	April-2013	Yes	n/a	n/a	n/a
OR5	Aeciospores	WWP (Cr2/-)	OR-Tyrrell	vcr2	April-2013	Yes	n/a	n/a	n/a
OR6	Aeciospores	WWP (Cr2/-)	OR-Tyrrell	vcr2	April-2013	Yes	n/a	n/a	n/a
HC1	Infected pine tissues	WWP (Cr2/-)	OR-Dorena GRC	vcr2	Sept-2011 (SY2010)	Yes	n/a	n/a	n/a
HC2	Infected pine tissues	WWP (Cr2/-)	OR-Dorena GRC	vcr2	Sept-2011 (SY2010)	Yes	n/a	n/a	n/a
HC3	Infected pine tissues	WWP (Cr2/-)	OR-Dorena GRC	vcr2	Sept-2011 (SY2010)	Yes	n/a	n/a	n/a
SB1	Infected pine tissues	WWP (cr2/cr2)	OR-Dorena GRC	avcr2	Sept-2011 (SY2010)	Yes	Yes	Yes	n/a
SB2	Infected pine tissues	WWP (cr2/cr2)	OR-Dorena GRC	avcr2	Sept-2011 (SY2010)	Yes	Yes	Yes	Yes (CrTV1-CrTV5)
SB3	Infected pine tissues	WWP (cr2/cr2)	OR-Dorena GRC	avcr2	Sept-2011 (SY2010)	Yes	Yes	Yes	n/a
C10	Infected pine tissues	LP (cr4/cr4)	OR-Dorena GRC	avcr2	July-2014 (SY2010)	Yes	n/a	n/a	n/a
C12	Infected pine tissues	LP (cr4/cr4)	OR-Dorena GRC	avcr2	July-2014 (SY2010)	Yes	n/a	n/a	n/a
C15	Infected pine tissues	LP (cr4/cr4)	OR-Dorena GRC	avcr2	July-2014 (SY2010)	Yes	n/a	n/a	n/a
C2	Infected pine tissues	LP (cr4/cr4)	OR-Dorena GRC	avcr2	July-2014 (SY2010)	Yes	n/a	n/a	n/a
C4	Infected pine tissues	LP (cr4/cr4)	OR-Dorena GRC	avcr2	July-2014 (SY2010)	Yes	n/a	n/a	n/a
C5	Infected pine tissues	LP (cr4/cr4)	OR-Dorena GRC	avcr2	July-2014 (SY2010)	Yes	n/a	n/a	n/a
C6	Infected pine tissues	LP (cr4/cr4)	OR-Dorena GRC	avcr2	July-2014 (SY2010)	Yes	n/a	n/a	n/a
C7	Infected pine tissues	LP (cr4/cr4)	OR-Dorena GRC	avcr2	July-2014 (SY2010)	Yes	n/a	n/a	n/a
C8	Infected pine tissues	LP (cr4/cr4)	OR-Dorena GRC	avcr2	July-2014 (SY2010)	Yes	n/a	n/a	n/a
1304-IN	Infected pine tissues	WBP	BC-Coombs	avcr2	Sept-2016 (SY2011)	Yes	n/a	n/a	n/a
1304-S	Infected pine tissues	WBP	BC-Coombs	avcr2	Sept-2016 (SY2011)	Yes	n/a	n/a	n/a
1304-UN	Infected pine tissues	WBP	BC-Coombs	avcr2	Sept-2016 (SY2011)	Yes	n/a	n/a	n/a
1401-S	Infected pine tissues	WBP	BC-Coombs	avcr2	Sept-2016 (SY2011)	Yes	n/a	n/a	n/a
1413-IN	Infected pine tissues	WBP	BC-Coombs	avcr2	Sept-2016 (SY2011)	Yes	n/a	n/a	n/a
1413-S	Infected pine tissues	WBP	BC-Coombs	avcr2	Sept-2016 (SY2011)	Yes	n/a	n/a	n/a
1413-UM	Infected pine tissues	WBP	BC-Coombs	avcr2	Sept-2016 (SY2011)	Yes	n/a	n/a	n/a
601-IN	Infected pine tissues	WBP	BC-Coombs	avcr2	Sept-2016 (SY2011)	Yes	n/a	n/a	n/a
601-S	Infected pine tissues	WBP	BC-Coombs	avcr2	Sept-2016 (SY2011)	Yes	n/a	n/a	n/a
Note (a) WWP-western white pine, LP-limber pine, and WBP-whitebark pine

## Sheet: Tab-S2_NGS-Blast
Table S2: Contigs of the Cronartium ribicola transcriptome with significant homologies to Totiviruses revealed by Blastx analysis
Transcriptome contig	Length (bp)	Lowest E-value	Accession (E-value)	Description (E-value)	CrTV annotation
SB-tri-comp179350_c0_seq1	5096	1.99537e-12	YP_009025166	RNA-dependent RNA polymerase, partial [Persimmon latent virus]	CrTV1
Cr6-comp86831_c0_seq1	274	1.41705e-24	YP_007697651	RNA-dependent RNA polymerase [Xanthophyllomyces dendrorhous virus L1A]	CrTV2
Cr6-comp65418_c0_seq1	349	2.2061e-23	YP_007697651	RNA-dependent RNA polymerase [Xanthophyllomyces dendrorhous virus L1A]	CrTV2
Cr6-comp99291_c0_seq1	361	2.36134e-18	YP_007697651	RNA-dependent RNA polymerase [Xanthophyllomyces dendrorhous virus L1A]	CrTV2
SB-comp169147_c0_seq1	1256	5.08199e-53	NP_620495	RNA polymerase [Saccharomyces cerevisiae virus L-A]	CrTV2
SB-comp169147_c1_seq1	3546	1.16436e-24	YP_007697651	RNA-dependent RNA polymerase [Xanthophyllomyces dendrorhous virus L1A]	CrTV2
Cr6-comp596363_c0_seq1	286	1.19384e-23	YP_001497151	RNA-dependent RNA polymerase [Black raspberry virus F]	CrTV3
Cr6-comp123901_c0_seq1	634	6.5464e-38	YP_007697651	RNA-dependent RNA polymerase [Xanthophyllomyces dendrorhous virus L1A]	CrTV3
Cr6-comp123314_c0_seq1	791	6.99723e-28	YP_007697651	RNA-dependent RNA polymerase [Xanthophyllomyces dendrorhous virus L1A]	CrTV3
SB-comp156811_c0_seq1	1918	2.31028e-120	YP_007697651	RNA-dependent RNA polymerase [Xanthophyllomyces dendrorhous virus L1A]	CrTV3
Cr6-comp474165_c0_seq1	326	8.20549e-23	YP_007697651	RNA-dependent RNA polymerase [Xanthophyllomyces dendrorhous virus L1A]	CrTV4
SB-comp1000032_c0_seq1	814	1.45969e-71	YP_007697651	RNA-dependent RNA polymerase [Xanthophyllomyces dendrorhous virus L1A]	CrTV4
SB-comp154677_c0_seq1	984	4.94363e-32	YP_007697651	RNA-dependent RNA polymerase [Xanthophyllomyces dendrorhous virus L1A]	CrTV4
Cr6-comp118915_c0_seq1	220	1.47701e-13	YP_001497150	coat protein [Black raspberry virus F]	CrTV5
Cr6-comp84112_c0_seq1	357	1.1831e-11	YP_001497150	coat protein [Black raspberry virus F]	CrTV5
Cr6-comp1221197_c0_seq1	331	9.72045e-12	YP_001497150	coat protein [Black raspberry virus F]	CrTV5
Cr6-comp798196_c0_seq1	212	6.23637e-05	YP_001497150	coat protein [Black raspberry virus F]	CrTV5
Cr6-comp119717_c1_seq1	405	3.05969e-38	YP_001497151	RNA-dependent RNA polymerase [Black raspberry virus F]	CrTV5
SB-comp32786_c0_seq1	690	3.35967e-39	YP_001497151	RNA-dependent RNA polymerase [Black raspberry virus F]	CrTV5
SB-comp1861786_c0_seq1	202	2.30119e-22	YP_001497151	RNA-dependent RNA polymerase [Black raspberry virus F]	CrTV5

## Sheet: Tab-S3_primers
Table S3: Oligonucleotide sequences
	Primer ID	Primer-seq (5 '> 3')	Usage
CrTV1	CrTV1-F01	CGT AGC AGC ATC AAT GTG TTG	Cloning of internal fragment
	CrTV1-R02	AA GCT GTG ATG CCC ATC GGT	Cloning of internal fragment
	CrTV1-F02	CCC TAT GTA GTC AAG CTA CC	Cloning of internal fragment
	CrTV1-R03	CAC GTG ATG GAT CTG CAC ATC	Cloning of internal fragment
	CrTV1-F03	GAG AGT GTT ACA CAG CCA TC	Cloning of internal fragment
	CrTV1-R04	GGG TGT CTG CTT GGC TAC CAT	Cloning of internal fragment
	CrTV1-F04	TCC ACA AAA CCC GAG GCA GGA	Cloning of internal fragment
	CrTV1-R05	TGT GTC TGC GTA CAC TTC ATC	Cloning of internal fragment
	CrTV1-R01	GC AGC CAC ATA AAG GAT GCA	5'-RACE for cDNA synthesis
	CrTV1-R12	CAA CAC ATT GAT GCT GCT ACG	5'-RACE for PCR
	CrTV1-F05	ACT GAG AAC ACC CTG CTG AA	3'-RACE for cDNA synthesis
	CrTV1-F52	GAT GAA GTG TAC GCA GAC ACA	3'-RACE for PCR
	CrTV1-For	CCTCTTCGCCGAGCTCAA	qRT-PCR to test viral abundance
	CrTV1-Rev	CATGGCCTGTCCTACACCATAG	qRT-PCR to test viral abundance
CrTV2	CrTV2-F01	ACC CAC AAC TCA CTT GCT GG	Cloning of internal fragment
	CrTV2-R02	GT TTC AGT ACC AGG CTG TGC	Cloning of internal fragment
	CrTV2-F02	C CAT GAG GAA AAC AAG CAA GC	Cloning of internal fragment
	CrTV2-R03	GTA CCT TGT AGA CAC TGT ACC	Cloning of internal fragment
	CrTV2-F03	GGA GCA CCA CGT GCT CTA AC	Cloning of internal fragment
	CrTV2-R04	CAC CAA GTT TTG TGC TGC CTT	Cloning of internal fragment
	CrTV2-F04	CTA TCC GTG CCA GAA CGA ATG	Cloning of internal fragment
	CrTV2-R05	TG TGC ACC GGG TAG TCC TTT	Cloning of internal fragment
	CrTV2-R01	TAG TCT TTG CTC ACG AGC ATC	5'-RACE for cDNA synthesis
	CrTV2-R22	CC AGC AAG TGA GTT GTG GGT	5'-RACE for PCR
	CrTV2-F05	TGG GGT GTT GAG TTT GAT AC	3'-RACE for cDNA synthesis
	CrTV2-F52	AAA GGA CTA CCC GGT GCA CA	3'-RACE for PCR
	CrTV2-For	TTAAGGTGGAAGGTAAATGGATCAG	qRT-PCR to test viral abundance
	CrTV2-Rev	AGTGGTTAGTCTCCAGCCAGAAA	qRT-PCR to test viral abundance
CrTV3	CrTV3-F01	GT CAA GTA ATG ATT CGG ACT G	Cloning of internal fragment
	CrTV3-R02	TGC CAA CGC ATC CTC ATA CCA	Cloning of internal fragment
	CrTV3-F02	ATG GAC GAA GGG AGC TAC GC	Cloning of internal fragment
	CrTV3-R03	TAC AGC CAT TGC AAA AGT CTG	Cloning of internal fragment
	CrTV3-F03	CAT ATG TTT GGG ATA GAC TGG	Cloning of internal fragment
	CrTV3-R04	CA GGT GTT TGG AAC CGT TCG	Cloning of internal fragment
	CrTV3-F04	GGT ATT GGT CAA GTT GAT TGG	Cloning of internal fragment
	CrTV3-R05	TC TTC CCT CTT CTC CTC AAC	Cloning of internal fragment
	CrTV3-R01	AGG ATC TTT GGC GTG AAC ACC	5'-RACE for cDNA synthesis
	CrTV3-R12	C AGT CCG AAT CAT TAC TTG AC	5'-RACE for PCR
	CrTV3-F05	TGG AGA GTG ACT GTC GAG GA	3'-RACE for cDNA synthesis
	CrTV3-F52	GTT GAG GAG AAG AGG GAA GA	3'-RACE for PCR
	CrTV3-For	CGATGGACTGGGTGATCCA	qRT-PCR to test viral abundance
	CrTV3-Rev	CCACTGTCCATCCTCACTTTTG	qRT-PCR to test viral abundance
CrTV4	CrTV4-F01	GGA CTA GAA GAA TAC CGC ATG	Cloning of internal fragment
	CrTV4-R01	GTA CCC ATA GTC TAC GAT GTG	Cloning of internal fragment
	CrTV4-liF31	ACA GCA TGG TAT TGG GGA GA	Cloning of internal fragment
	CrTV4-liR01	TAC ATT ACC ATA CGG GAA TGC	Cloning of internal fragment
	CrTV4-F02	GT ATG ACG CCA GGA GCG TT	Cloning of internal fragment
	CrTV4-R02	CGG AAC ATG TAC CAC CAT GTT	Cloning of internal fragment
	CrTV4-F03	ATG CAA GCA GTT ATG TTG GC	Cloning of internal fragment
	CrTV4-R03	AC TCC GTG CGC TAA AGC CAT	Cloning of internal fragment
	CrTV4-R11	GAC CAT TGC TTT GTT CAT ACC	5'-RACE for cDNA synthesis
	CrTV4-R12	AGG TAC CCA CTC ACT CTT CAT	5'-RACE for PCR
	CrTV4-F11	CAG TAC TTC CCT GGA GCT TA	3'-RACE for cDNA synthesis
	CrTV4-F12	GAT GTC AAG TTT GGG ATA AGG	3'-RACE for PCR
	CrTV4-For	TGCTGTGTTGAAGGCTATGGAT	qRT-PCR to test viral abundance/Cloning of internal fragment
	CrTV4-Rev	GGCTTACCTGCACGTTCGA	qRT-PCR to test viral abundance/Cloning of internal fragment
CrTV5	CrTV5-F01	ATG ACC ATG GCA CAG ACC AT	Cloning of internal fragment
	CrTV5-R01	GTC ACC GTC GAC GTC TTG	Cloning of internal fragment
	CrTV5-F02	CAA CCT GAT TTG GCT GC	Cloning of internal fragment
	CrTV5-R02	TTG CCA TGT ATC AGC ATC GTC	Cloning of internal fragment
	CrTV5-F03	ACC ATA CCC GTG TTC GTT GA	Cloning of internal fragment
	CrTV5-R03	GAG GTC AAC ACC GTA TAT TGC	Cloning of internal fragment
	CrTV5-R11	CCA GTG TTC GGT AGC ATT AAC	5'-RACE for cDNA synthesis
	CrTV5-R12	GTC TAC GTC AGT AGG CCC TT	5'-RACE for PCR
	CrTV5-LiF01	CA GAA GAT GAC CCT TTC ATC GT	3'-RACE for cDNA synthesis
	CrTV4-F30	GTT GTG TCA AAA GCA GCC AA	3'-RACE for cDNA synthesis/for PCR
	CrTV5-F22	TCT CGT CAA CCA CAG ACA CA	3'-RACE for PCR
	CrTV5-For	GCGGCATCGGTGATAATCA	qRT-PCR to test viral abundance
	CrTV5-Rev	CATAGCGGTCAAGTTGAGCATGA	qRT-PCR to test viral abundance
α-tubline gene	Cri-α-tub-For	AAG AAG CCT TGG AGA CCA GAG	Internal contro for qRT-PCR
	Cri-α-tub-Rev	TCG GAG ACT GGA AGT GGT AAA T	Internal contro for qRT-PCR

## Sheet: Tab-S4_CDD
Table S4: Blastp search of putative CrTV proteins against the NCBI Conserved Domain data base (CDD v3.16-50369 PSSMs)
Sequence ID	Name	Accession	Description	Interval	E-value
CrTV1-orf1	Marek_A super family	cl28111	Herpesvirus glycoprotein A;	764-855	0.00285
CrTV2-orf1	LA-virus_coat super family	cl07739	L-A virus, major coat protein; Members of this family form the major coat protein of the Saccharomyces cerevisiae L-A virus.	388-559	8.36e-06
CrTV3-orf1	na	na	na	na	na
CrTV4-orf1	LA-virus_coat super family	cl07739	L-A virus, major coat protein; Members of this family form the major coat protein of the ...	383-494	0.00344
CrTV5-orf1	LA-virus_coat super family	cl07739	L-A virus, major coat protein; Members of this family form the major coat protein of the ...	45-433	3.32e-87
CrTV1-orf2	RT_like super family	cl02808	RT_like: Reverse transcriptase (RT, RNA-dependent DNA polymerase)_like family.	267-574	1.81e-10
CrTV2-orf2	RT_like super family	cl02808	RT_like: Reverse transcriptase (RT, RNA-dependent DNA polymerase)_like family.	316-688	4.03e-59
CrTV3-orf2	RT_like super family	cl02808	RT_like: Reverse transcriptase (RT, RNA-dependent DNA polymerase)_like family. An RT gene is ...	154-521	2.23e-53
CrTV4-orf2	RT_like super family	cl02808	RT_like: Reverse transcriptase (RT, RNA-dependent DNA polymerase)_like family. An RT gene is ...	172-590	7.13e-59
CrTV5-orf2	RT_like super family	cl02808	RT_like: Reverse transcriptase (RT, RNA-dependent DNA polymerase)_like family.	217-596	8.75e-60

## Sheet: Tab-S5_Pfam
Table S5: Blastp search of putative CrTV proteins against EMBL-EBI Pfam database (Pfam 32.0 , released September 2018, 17929 entries)
CrTV ID	ORF	Family	Description	Entry type	Clan	Envelope		Alignment		HMM		HMM length	Bit score	E-value	GenBank acc.	Full-length cDNA seq
						Start	End	Start	End	From	To
CrTV1	orf2	RdRP_4	Viral RNA-directed RNA-polymerase	Family	CL0027	128	574	263	574	180	479	479	52.5	3.8e-14	MK967418	AACAACAAAAGAGAATAAAAACCTGTTGCCAACTACCTGAGTTAACCTGAAACAAGGACGAAAAGTGTACTCATGGAAAACTTTACCGCATATTCACGTGCCACCGCACCCGGAGTTTTACCACTCCCCACCACACAGACCTTCACGCTAGCTCAAGGCGTCAACCAAGCCCACTACGGGCATGAGCATAACCCCATCAAGACCATGCTGGCTTCCAGCGATGGCCTAACCCACCTCTTTGACAACGACAAGCTTTCGCTTGCCTACAGTTTGATGGCCCAGGACAAAGGAGTCATCAAGAAGAACCTCGCACTTGGGCGCATCTGGTCGCCCCACTACCCCATAACTGCCACATTCACAACTGGGCTAGCTGCACCGCCCCATCACTTGGAAGTCGCC…
CrTV2	orf2	RdRP_4	Viral RNA-directed RNA-polymerase	Family	CL0027	234	690	317	688	96	477	479	190.4	5.4e-56	MK967419	TTTTTGAATTATAGCATATAATCCCCAAAAACTAACACACCACCAACCCACAGCACACAACTATGGACAGCTTCAGTGAACTGATCAACTACAACGCATCACCCCTCTCTATAGTTAACGGAGAGGTTTGGACGCGTACAGACTTGCGTCTGAAAGTCTTAAACGTGGAGGCAGGTAAAATACTGCCTTCAGACATACAACAGAACAAAAAACCAATTTCGCAACTGCCATCAGGAACAGGCGAAGTTAGGCCTCATGATATGAGACACACCAGTCATTGCATATCAAAAGGGACAGTCTATGGTAAACCATGTACTTGGTCTACCGACGTGACCCACAACTCACTTGCTGGAATAAACAAAACTTGTTTAACTACGGACGGAACTATCAGCTTTAATG…
CrTV3	orf2	RdRP_4	Viral RNA-directed RNA-polymerase	Family	CL0027	131	523	153	521	100	477	479	181.6	2.5e-53	MK967420	AAAACTTTAAAATTGGCATACAATCCCCAAATTTATAAAAATTTCGCCTCAACACACACACAACCACAAAATGCAAAACTTAAAAGATATCATTGATTTAGATGTCGTGGTCGAAAAGATCACAGATGGTCAAGTAATGATTCGGACTGACTTAGAACTTAATCTAGTTGGCGTTGAGAAAGCGCAAATAGAAGAATACGATGTACAAAGAGATAGAATCTCAAACATCGGTGTTCACGCCAAAGATCCTGAAGTAGCGAGATTTGAATCGCATTCTCAGGCTCTGGGCCAACACTGTCAGATGAGGAGGTTAACACAGACCTCATCACTTGGCACTGTTTACGGCATGTCACAAGAGGTGACAATGACGGTGTCCCAACACTCAGTGTTTGGGTATAA…
CrTV4	orf2	RdRP_4	Viral RNA-directed RNA-polymerase	Family	CL0027	162	592	225	590	103	477	479	185	2.4e-54	MK967421	AAATTTTAAAACAAAAGGATACAATTCCCGTTTAAAATTCACCTTGCGCACACACACACCACTATGCAAAACATCATTAACACTCAAACCGTGGCGGATAGCTACAACCGTGGGGAAGTCTACTTCAAGACTGACCTAAAACTGGCTCTCGCTAGTATCCATACGCGTGACACCAGCGATGGAGTCATCGAAAAGAAGAAAACTAGTCTATTGGGTATAAATCCCGAAAATTATAAAAATATTAAACAAGAGTTTGATCTTGGACTAGAAGAATACCGCATGCGTAATGCAGTCTCATGTTTATCCAAAGGGACAGTATACGGCATGAAGAGTGAGTGGGTACTTGGTGTGCGTAAGCATTCACACTATGGTATGAACAAAGCAATGGTCACTAGTGAG…
CrTV5	orf2	RdRP_4	Viral RNA-directed RNA-polymerase	Family	CL0027	161	597	210	596	97	478	479	187.7	3.7e-55	MK967422	AATTTATTTCAGGCATATCAAACCCAAATAAATTAACGCAATGGACCAACTCATGCAAAAGCTCTTCCCAACTACCGAAACTGCTGGTGCAGATTTCAAAAATGAAGGCGGTGTTTACAACACCATGCTTCGCGGTAACTTCACTGTTGACGTAAACGGCGACAGTGGGTTGCGACCCATGACCATGGCACAGACCATGACCTACCTTGGCCGCAGCAAGGTAGAGATGTGTGAAGGGCCTACTGACGTAGACGGGCTCAACAAAAACTTTCTTACCCCGGAAGGGAACATAAATTTTATCGCTGTGTCATCAGCTCTCAAAAGTCATTCAGGACTTCAGTCACAAAACTGGAGTTCACATGTTAATGCTACTGAACACTGGCCGTGGCGTGATAACCA…

## Sheet: Tab-S6-RdRp
Table S6: Identities of amino acid sequences among putative RdRps encoded by representative members of the family Totiviridae
	UmV-H1_NC_003823_	RPaTV9_NC_028490_	CrTV1-orf2	HTLK-6_APG75978_	PpRV-2_LC376045_	DcaRV-17A_BAU79517_	DcaRV-17B_BAU79519_	IMNV_AY570982_	ASV_EU715328_	ORV_AB555544_	DTV_GQ342961_	SSV-L_KC610514_	RPaTV2_NC_028481_	SCV-L-BC_U01060_	RPaTV7_NC_028488_	PsV3_KY207363_	CrTV4-orf2	PsV1_KY207361_	RPaTV5_NC_028485_	PsV2_KY207362_	CrTV2-orf2	PaMV_KT222801_	CrTV3-orf2	RPaTV6_NC_028486_	RPaTV8_LC075493_	RPaTV3_NC_028483_	XDV-L1A_JN997472_	RPaTV4_LC075489_	XDV-L1B_JN997473_	SCV-LA_NC_003745_	TAV-1_HQ158596_	MaTV-1_NC_028044_	BRV-F_NC_009890_	PnV-A_NC_029096_	PsV5_KY207365_	RPaTV1a_NC_028480_	CrTV5-orf2	PeLV_NC_023983_	TVV-1_TVU08999_	TVV-2_AF127178_	TVV-4_HQ607522_	TVV-3_AF325840_	LRV-1-1_M92355_	LRV-2-1_U32108_	GARV-L1_NC_003876_	HMV-1-17_NC_005074_	MOV-1_NC_006367_	HVV-190S_NC_003607_	TCV-1_NC_014823_
UmV-H1_NC_003823_	100	20.84	18.26	17.76	19.56	20.06	20.2	14.09	14.75	14.67	14.59	15.04	15.84	14	16.87	17.57	18.35	17.02	17.69	16.45	15.81	16.74	18.62	16.03	14.8	17.15	16.8	18.72	15.92	16.16	17.1	15.94	16.42	15.74	17.76	16.85	17.1	17.73	15.79	16.98	15.99	17.07	13.35	15.17	17.73	15.06	15.45	16.86	16.57
RPaTV9_NC_028490_	20.84	100	19	20.87	22.18	21.51	21.83	11.39	10.55	11.7	11.06	13.9	16.92	15.8	15.72	14.81	16.07	15.22	15.43	16.54	16.59	16.13	17.11	15.27	18.17	16.99	17.76	18.82	15.65	16.42	17.37	16.89	17.55	16.83	16.69	17.38	16.34	17.4	15.44	16.12	14.26	14.98	13.97	16.47	17.18	17.2	15.37	16.43	14.88
CrTV1-orf2	18.26	19	100	28.9	31.8	29.87	29.72	12.77	11.05	12.67	13.91	16.78	12.54	16.7	16.33	14.64	14.62	16.03	15.91	15.77	16.3	15.94	17.1	15.58	17.11	15.14	16.55	17.74	16.92	14.67	15.51	16.5	15.97	15.47	16.33	16.84	15.19	16.28	15.31	14.89	13.52	13.86	14.56	16.03	16.46	14.29	16.43	17.01	15.56
HTLK-6_APG75978_	17.76	20.87	28.9	100	30.89	32.57	31.87	12.61	13.02	12.45	12.24	15.27	14.5	17.1	17.38	16.82	16.17	17.16	17.01	16.64	17.13	16.39	16.7	15.3	15.67	17.71	15.81	16.95	17.14	17.25	15.51	16.17	18.57	16.7	17.54	16.23	18.08	17.93	17.24	17.79	16.06	17.51	16.49	18.75	15.96	16.39	16.95	16.42	14.94
PpRV-2_LC376045_	19.56	22.18	31.8	30.89	100	38.36	38.18	13.25	15.03	12.83	13.73	16.54	15.46	15.62	17.94	15.82	15.4	18.68	17.17	17.08	17.61	15.5	16.73	16.57	17.58	15.18	16.21	16.8	16.83	16.63	16.6	16	15.02	17.49	16.12	16.22	14.72	18.74	15.13	16.67	15.07	16.05	16.63	17.93	17.12	18.2	19.38	16.8	17.58
DcaRV-17A_BAU79517_	20.06	21.51	29.87	32.57	38.36	100	90.92	12.72	12.97	13.07	12.19	16.33	16.09	16.27	18.05	16.4	17.45	15.18	15.89	17.24	17.92	15.56	16.4	17.66	17.47	15.97	15.25	17.07	17.45	17.99	16.19	16.79	14.97	16.58	18.24	16.88	16.31	17.44	14.72	14.79	13.83	14.58	14.29	16	14.97	16.56	15.44	14.99	13.82
DcaRV-17B_BAU79519_	20.2	21.83	29.72	31.87	38.18	90.92	100	12.19	12.97	13.07	11.96	16.7	16.09	16.08	18.23	16.58	17.63	15.71	15.89	17.59	17.74	15.74	16.76	17.66	17.11	15.97	15.61	17.45	18	17.63	17.27	17.5	15.86	16.58	18.04	16.88	16.67	17.89	14.18	14.79	13.83	14.58	14.96	16.33	14.8	16.24	15.27	14.83	13.98
IMNV_AY570982_	14.09	11.39	12.77	12.61	13.25	12.72	12.19	100	43.71	41.94	44.54	14.19	12.39	13.29	11.32	11.24	11.15	11.97	12.07	12.87	12.74	13.94	13.07	12.76	12.46	13.04	14.31	13.74	15.53	13.69	13.15	14.41	13.53	14.21	16.02	12.72	13.82	17.53	13.21	12.55	13.28	12.55	13.6	14.73	14.89	15.95	16.56	14.38	14.57
ASV_EU715328_	14.75	10.55	11.05	13.02	15.03	12.97	12.97	43.71	100	49	50.48	13.25	13.36	13.23	12.97	12.54	12.65	13.11	13.22	13.46	13.5	13.65	13.33	13.03	11.35	14.07	13.77	12.64	12.41	14.58	14.04	14.43	13.57	14.57	16.76	14.09	14.81	15.55	15.58	13.84	12.2	14.39	14.92	13.92	17.48	15.17	14.98	13.94	14.12
ORV_AB555544_	14.67	11.7	12.67	12.45	12.83	13.07	13.07	41.94	49	100	66.34	12.91	11.57	13.25	11.13	11.24	12.62	12.9	12.85	12.91	12.46	12.27	12.46	12.82	11.06	12.4	13.93	12.15	12.79	13.73	13.52	12.12	12.74	13.39	15.38	12.93	14.12	17.37	15.84	14.54	14.01	13.31	13.88	14.33	14.58	14.38	15.13	14.76	13.99
DTV_GQ342961_	14.59	11.06	13.91	12.24	13.73	12.19	11.96	44.54	50.48	66.34	100	12.1	13.03	11.78	13.58	13.42	12.72	12.66	13.43	13.73	13.36	13.12	12.93	13.65	11.53	11.78	14.19	13.24	14.41	13.43	15.32	13.66	14.05	14.47	16.75	14.26	14.11	16.64	17.82	13.1	14.94	12.64	14.43	15.09	16.36	14.66	14.8	12.68	13.1
SSV-L_KC610514_	15.04	13.9	16.78	15.27	16.54	16.33	16.7	14.19	13.25	12.91	12.1	100	31.45	32.69	24.74	25.71	25.39	26.34	27.04	27.99	26.82	25.69	29.39	25.33	25.76	27.49	28.42	29.12	27.88	25.18	27.88	26.64	28.29	27.06	28.47	25.65	26.3	15.41	16.75	17.11	16.69	16.39	17.2	17.4	18.06	15.83	17.9	17.61	17.54
RPaTV2_NC_028481_	15.84	16.92	12.54	14.5	15.46	16.09	16.09	12.39	13.36	11.57	13.03	31.45	100	33.55	23.12	24.53	23.55	23.04	24.77	22.79	24.19	25.5	26.16	25	25.2	26.49	25.41	25.82	23.64	26.99	26.75	25.37	24.57	25.1	27.8	23.82	24.3	15.79	16.46	18.14	17.45	15.41	17.09	18.58	16.62	14.9	17.42	16.15	16.99
SCV-L-BC_U01060_	14	15.8	16.7	17.1	15.62	16.27	16.08	13.29	13.23	13.25	11.78	32.69	33.55	100	24.21	25.19	26.68	25.81	25.62	25.97	24.38	24.84	27.64	25.33	26.85	28.1	28.26	28.43	26.84	26.3	27.93	27.54	27.96	27.91	26.57	27.21	25.52	16.12	16.24	16.72	15.62	16.11	17.07	17.59	15.81	16.93	18.58	19.21	17.85
RPaTV7_NC_028488_	16.87	15.72	16.33	17.38	17.94	18.05	18.23	11.32	12.97	11.13	13.58	24.74	23.12	24.21	100	37.36	37.45	36.99	38.4	38.53	39.58	35.24	39.28	36.28	38.17	28	30.11	29.39	28.48	28.99	28.5	28.57	28.32	27.02	28.75	27.47	28.12	14.86	18.95	16.72	17.38	18.49	17.23	18.55	17.72	16.02	16.86	18.99	18.33
PsV3_KY207363_	17.57	14.81	14.64	16.82	15.82	16.4	16.58	11.24	12.54	11.24	13.42	25.71	24.53	25.19	37.36	100	55.54	39.08	39.56	41.83	40.56	37.93	44.92	33.88	35.11	28.5	29.09	28.55	30	27.71	28.98	26.68	27.92	27.5	28.5	25.58	28.16	15.69	17.74	18.33	18.35	17.89	17.14	17.74	16.16	16.76	19.19	17.71	18.21
CrTV4-orf2	18.35	16.07	14.62	16.17	15.4	17.45	17.63	11.15	12.65	12.62	12.72	25.39	23.55	26.68	37.45	55.54	100	40.32	40.18	42.59	42.46	39.85	43.45	36.43	35.54	28.61	29.97	30	29.49	27.23	28.94	28.15	28.66	27.26	28.94	28.85	29.05	16.14	18.59	18.9	18.03	17.97	17.64	18.58	16.64	15.49	17.54	18.09	18.16
PsV1_KY207361_	17.02	15.22	16.03	17.16	18.68	15.18	15.71	11.97	13.11	12.9	12.66	26.34	23.04	25.81	36.99	39.08	40.32	100	41.11	43.68	40.59	38.17	45.08	35.26	36.08	29.14	30.34	29.69	28.95	29.23	27.33	26.73	28.21	27.16	28.5	27.27	26.89	15.11	18.26	16.93	16.44	19.74	18.88	18.2	17.3	17.37	16.98	17.76	17.96
RPaTV5_NC_028485_	17.69	15.43	15.91	17.01	17.17	15.89	15.89	12.07	13.22	12.85	13.43	27.04	24.77	25.62	38.4	39.56	40.18	41.11	100	40.27	44.06	41.66	46.35	35.81	35.79	29.78	30.21	30.72	27.81	28.21	27.19	29.65	28.02	27.6	29.01	29.46	28.19	15.4	17	17.85	17.79	16.97	17.35	19.14	15.99	15.77	16.72	17.27	19.91
PsV2_KY207362_	16.45	16.54	15.77	16.64	17.08	17.24	17.59	12.87	13.46	12.91	13.73	27.99	22.79	25.97	38.53	41.83	42.59	43.68	40.27	100	46.66	40.21	46.97	35.61	36.51	29.58	30.6	29.7	28.68	28.61	28.46	27.8	26.93	27.91	29.16	27.69	27.87	14.91	18.07	18.39	18.25	17.62	16.45	17.59	16.18	13.39	18.39	18.04	19.25
CrTV2-orf2	15.81	16.59	16.3	17.13	17.61	17.92	17.74	12.74	13.5	12.46	13.36	26.82	24.19	24.38	39.58	40.56	42.46	40.59	44.06	46.66	100	41.31	47.45	36.54	36.56	30.26	30.51	31.99	30.85	29.7	29.79	29.16	29.11	27.94	28.99	28.46	28.25	14.89	16.74	19	18.28	18.63	15.32	17.31	17.32	13.37	19.24	17.58	18.65
PaMV_KT222801_	16.74	16.13	15.94	16.39	15.5	15.56	15.74	13.94	13.65	12.27	13.12	25.69	25.5	24.84	35.24	37.93	39.85	38.17	41.66	40.21	41.31	100	51.84	37.55	35.96	29.43	29.44	29.51	28.5	26.8	28.24	27.99	28.54	27.98	28	26.54	25.79	14.7	16.69	16.61	17.75	18.06	16.76	19.78	17.95	15.71	17.84	18.89	17.96
CrTV3-orf2	18.62	17.11	17.1	16.7	16.73	16.4	16.76	13.07	13.33	12.46	12.93	29.39	26.16	27.64	39.28	44.92	43.45	45.08	46.35	46.97	47.45	51.84	100	37.81	36.79	31.29	32.47	32.93	32.66	29.28	29.48	29.51	29.09	29.09	30.1	28.59	27.54	16.67	18.28	17.82	17.25	17.76	17.38	17.69	18.08	16.46	17.87	17.93	19.38
RPaTV6_NC_028486_	16.03	15.27	15.58	15.3	16.57	17.66	17.66	12.76	13.03	12.82	13.65	25.33	25	25.33	36.28	33.88	36.43	35.26	35.81	35.61	36.54	37.55	37.81	100	37.96	29.78	30.48	31	29.1	27.32	26.84	28.7	26.88	27.64	29.37	26.32	25.64	15.01	15.05	17.31	17.94	18.11	15.36	17.4	16.98	16.48	18.83	18.01	19.08
RPaTV8_LC075493_	14.8	18.17	17.11	15.67	17.58	17.47	17.11	12.46	11.35	11.06	11.53	25.76	25.2	26.85	38.17	35.11	35.54	36.08	35.79	36.51	36.56	35.96	36.79	37.96	100	29.96	30.97	30.89	31.92	28.87	28.79	28.04	26.85	28.01	28.57	27.5	26.97	16.21	15.75	16.59	18.65	17.05	18.3	18.97	17.96	17.26	18.61	19.03	17.81
RPaTV3_NC_028483_	17.15	16.99	15.14	17.71	15.18	15.97	15.97	13.04	14.07	12.4	11.78	27.49	26.49	28.1	28	28.5	28.61	29.14	29.78	29.58	30.26	29.43	31.29	29.78	29.96	100	43.63	43.97	42.24	29.06	30.05	29.29	30.41	29.42	30.31	29.64	28.55	17.49	15.49	17.08	17.4	17.47	18.09	17.84	17.16	15.83	19.08	17.76	18.26
XDV-L1A_JN997472_	16.8	17.76	16.55	15.81	16.21	15.25	15.61	14.31	13.77	13.93	14.19	28.42	25.41	28.26	30.11	29.09	29.97	30.34	30.21	30.6	30.51	29.44	32.47	30.48	30.97	43.63	100	51.86	51.05	28.69	30.2	29.5	29.23	28.04	30.75	30.79	27.79	16.5	18.84	16.64	18.11	18.86	15.79	17.74	17.22	16.2	17.14	17.63	16.86
RPaTV4_LC075489_	18.72	18.82	17.74	16.95	16.8	17.07	17.45	13.74	12.64	12.15	13.24	29.12	25.82	28.43	29.39	28.55	30	29.69	30.72	29.7	31.99	29.51	32.93	31	30.89	43.97	51.86	100	58.13	31.7	32.47	30.69	30.65	28.99	30.74	30.25	30.79	16.71	17.9	18.52	18.67	18.94	17.63	20.63	17.11	15.27	17.74	18.36	16.95
XDV-L1B_JN997473_	15.92	15.65	16.92	17.14	16.83	17.45	18	15.53	12.41	12.79	14.41	27.88	23.64	26.84	28.48	30	29.49	28.95	27.81	28.68	30.85	28.5	32.66	29.1	31.92	42.24	51.05	58.13	100	29.09	30.68	29.8	29.62	29.19	30.44	28.96	28.61	16.53	19.03	17.83	19.21	19.73	17.73	18.24	16.81	17.25	18.6	18.89	16.96
SCV-LA_NC_003745_	16.16	16.42	14.67	17.25	16.63	17.99	17.63	13.69	14.58	13.73	13.43	25.18	26.99	26.3	28.99	27.71	27.23	29.23	28.21	28.61	29.7	26.8	29.28	27.32	28.87	29.06	28.69	31.7	29.09	100	50.95	38.43	39.4	38.51	39.61	38.32	36.58	16.32	16.61	18.06	18.29	19.24	19.05	20.72	16.64	15.93	17.98	17	18.79
TAV-1_HQ158596_	17.1	17.37	15.51	15.51	16.6	16.19	17.27	13.15	14.04	13.52	15.32	27.88	26.75	27.93	28.5	28.98	28.94	27.33	27.19	28.46	29.79	28.24	29.48	26.84	28.79	30.05	30.2	32.47	30.68	50.95	100	40.03	38.5	36.98	42.08	36.71	36.22	16.28	18	16.56	17.34	17.88	17.03	17.88	16.16	16.05	18.16	17.77	18.99
MaTV-1_NC_028044_	15.94	16.89	16.5	16.17	16	16.79	17.5	14.41	14.43	12.12	13.66	26.64	25.37	27.54	28.57	26.68	28.15	26.73	29.65	27.8	29.16	27.99	29.51	28.7	28.04	29.29	29.5	30.69	29.8	38.43	40.03	100	53.26	53.47	42.77	43.68	44.09	16.19	16.67	15.42	16.62	16.48	17.12	17.97	17.22	15.77	18.63	16.55	17.05
BRV-F_NC_009890_	16.42	17.55	15.97	18.57	15.02	14.97	15.86	13.53	13.57	12.74	14.05	28.29	24.57	27.96	28.32	27.92	28.66	28.21	28.02	26.93	29.11	28.54	29.09	26.88	26.85	30.41	29.23	30.65	29.62	39.4	38.5	53.26	100	54.18	46.05	41.88	41.07	16.44	17.41	16.53	16.13	16.78	18.35	19.48	17.51	15.6	17.59	17.24	16.45
PnV-A_NC_029096_	15.74	16.83	15.47	16.7	17.49	16.58	16.58	14.21	14.57	13.39	14.47	27.06	25.1	27.91	27.02	27.5	27.26	27.16	27.6	27.91	27.94	27.98	29.09	27.64	28.01	29.42	28.04	28.99	29.19	38.51	36.98	53.47	54.18	100	44.44	41.25	42.44	17.19	15.72	16.37	15.36	14.98	17.92	18.1	16.35	15.6	17.73	16.81	16.45
PsV5_KY207365_	17.76	16.69	16.33	17.54	16.12	18.24	18.04	16.02	16.76	15.38	16.75	28.47	27.8	26.57	28.75	28.5	28.94	28.5	29.01	29.16	28.99	28	30.1	29.37	28.57	30.31	30.75	30.74	30.44	39.61	42.08	42.77	46.05	44.44	100	48.74	46.36	16.74	18.38	17.33	17.69	18.51	17.86	19.86	18.26	16.77	19.22	17.52	17.92
RPaTV1a_NC_028480_	16.85	17.38	16.84	16.23	16.22	16.88	16.88	12.72	14.09	12.93	14.26	25.65	23.82	27.21	27.47	25.58	28.85	27.27	29.46	27.69	28.46	26.54	28.59	26.32	27.5	29.64	30.79	30.25	28.96	38.32	36.71	43.68	41.88	41.25	48.74	100	45.94	15.38	17.94	15.6	15.71	17.99	18.01	19.25	17.86	16.31	17.53	17.3	15.63
CrTV5-orf2	17.1	16.34	15.19	18.08	14.72	16.31	16.67	13.82	14.81	14.12	14.11	26.3	24.3	25.52	28.12	28.16	29.05	26.89	28.19	27.87	28.25	25.79	27.54	25.64	26.97	28.55	27.79	30.79	28.61	36.58	36.22	44.09	41.07	42.44	46.36	45.94	100	15.24	17.05	18.11	16.07	15.9	17.3	17.72	17.88	16.67	17.54	16.45	16.67
PeLV_NC_023983_	17.73	17.4	16.28	17.93	18.74	17.44	17.89	17.53	15.55	17.37	16.64	15.41	15.79	16.12	14.86	15.69	16.14	15.11	15.4	14.91	14.89	14.7	16.67	15.01	16.21	17.49	16.5	16.71	16.53	16.32	16.28	16.19	16.44	17.19	16.74	15.38	15.24	100	16.64	18.6	18.72	17.85	18.46	18.24	18.21	20.36	20.13	19.25	19.74
TVV-1_TVU08999_	15.79	15.44	15.31	17.24	15.13	14.72	14.18	13.21	15.58	15.84	17.82	16.75	16.46	16.24	18.95	17.74	18.59	18.26	17	18.07	16.74	16.69	18.28	15.05	15.75	15.49	18.84	17.9	19.03	16.61	18	16.67	17.41	15.72	18.38	17.94	17.05	16.64	100	30.96	32.56	30.38	20.64	21.81	22.4	20.99	21.78	22.35	20.75
TVV-2_AF127178_	16.98	16.12	14.89	17.79	16.67	14.79	14.79	12.55	13.84	14.54	13.1	17.11	18.14	16.72	16.72	18.33	18.9	16.93	17.85	18.39	19	16.61	17.82	17.31	16.59	17.08	16.64	18.52	17.83	18.06	16.56	15.42	16.53	16.37	17.33	15.6	18.11	18.6	30.96	100	45.54	47.55	25.37	26.09	26.62	22.86	25.52	23.92	23.88
TVV-4_HQ607522_	15.99	14.26	13.52	16.06	15.07	13.83	13.83	13.28	12.2	14.01	14.94	16.69	17.45	15.62	17.38	18.35	18.03	16.44	17.79	18.25	18.28	17.75	17.25	17.94	18.65	17.4	18.11	18.67	19.21	18.29	17.34	16.62	16.13	15.36	17.69	15.71	16.07	18.72	32.56	45.54	100	58.88	23.35	22.48	24.08	20.41	21.97	23.29	23.4
TVV-3_AF325840_	17.07	14.98	13.86	17.51	16.05	14.58	14.58	12.55	14.39	13.31	12.64	16.39	15.41	16.11	18.49	17.89	17.97	19.74	16.97	17.62	18.63	18.06	17.76	18.11	17.05	17.47	18.86	18.94	19.73	19.24	17.88	16.48	16.78	14.98	18.51	17.99	15.9	17.85	30.38	47.55	58.88	100	23.37	23.42	24.14	21.12	22.12	23.68	23.34
LRV-1-1_M92355_	13.35	13.97	14.56	16.49	16.63	14.29	14.96	13.6	14.92	13.88	14.43	17.2	17.09	17.07	17.23	17.14	17.64	18.88	17.35	16.45	15.32	16.76	17.38	15.36	18.3	18.09	15.79	17.63	17.73	19.05	17.03	17.12	18.35	17.92	17.86	18.01	17.3	18.46	20.64	25.37	23.35	23.37	100	45.74	29.04	29.91	28.66	28.57	28.66
LRV-2-1_U32108_	15.17	16.47	16.03	18.75	17.93	16	16.33	14.73	13.92	14.33	15.09	17.4	18.58	17.59	18.55	17.74	18.58	18.2	19.14	17.59	17.31	19.78	17.69	17.4	18.97	17.84	17.74	20.63	18.24	20.72	17.88	17.97	19.48	18.1	19.86	19.25	17.72	18.24	21.81	26.09	22.48	23.42	45.74	100	29.9	27.5	27.36	27.16	28.08
GARV-L1_NC_003876_	17.73	17.18	16.46	15.96	17.12	14.97	14.8	14.89	17.48	14.58	16.36	18.06	16.62	15.81	17.72	16.16	16.64	17.3	15.99	16.18	17.32	17.95	18.08	16.98	17.96	17.16	17.22	17.11	16.81	16.64	16.16	17.22	17.51	16.35	18.26	17.86	17.88	18.21	22.4	26.62	24.08	24.14	29.04	29.9	100	33.66	32.42	33.42	32.88
HMV-1-17_NC_005074_	15.06	17.2	14.29	16.39	18.2	16.56	16.24	15.95	15.17	14.38	14.66	15.83	14.9	16.93	16.02	16.76	15.49	17.37	15.77	13.39	13.37	15.71	16.46	16.48	17.26	15.83	16.2	15.27	17.25	15.93	16.05	15.77	15.6	15.6	16.77	16.31	16.67	20.36	20.99	22.86	20.41	21.12	29.91	27.5	33.66	100	37.33	34.6	34.6
MOV-1_NC_006367_	15.45	15.37	16.43	16.95	19.38	15.44	15.27	16.56	14.98	15.13	14.8	17.9	17.42	18.58	16.86	19.19	17.54	16.98	16.72	18.39	19.24	17.84	17.87	18.83	18.61	19.08	17.14	17.74	18.6	17.98	18.16	18.63	17.59	17.73	19.22	17.53	17.54	20.13	21.78	25.52	21.97	22.12	28.66	27.36	32.42	37.33	100	38.88	39.34
HVV-190S_NC_003607_	16.86	16.43	17.01	16.42	16.8	14.99	14.83	14.38	13.94	14.76	12.68	17.61	16.15	19.21	18.99	17.71	18.09	17.76	17.27	18.04	17.58	18.89	17.93	18.01	19.03	17.76	17.63	18.36	18.89	17	17.77	16.55	17.24	16.81	17.52	17.3	16.45	19.25	22.35	23.92	23.29	23.68	28.57	27.16	33.42	34.6	38.88	100	43.46
TCV-1_NC_014823_	16.57	14.88	15.56	14.94	17.58	13.82	13.98	14.57	14.12	13.99	13.1	17.54	16.99	17.85	18.33	18.21	18.16	17.96	19.91	19.25	18.65	17.96	19.38	19.08	17.81	18.26	16.86	16.95	16.96	18.79	18.99	17.05	16.45	16.45	17.92	15.63	16.67	19.74	20.75	23.88	23.4	23.34	28.66	28.08	32.88	34.6	39.34	43.46	100
AFSV-1_HE588147_	14.96	14.72	16.14	13.97	18.58	16.23	15.26	15.15	14.86	14.55	16.5	18.34	16.44	18.49	18.41	20.43	18.52	19.74	17.55	19.05	18.59	19.46	19.91	18.71	17.57	17.61	15.98	17.75	18.3	18.59	17.6	19.14	17.53	17.1	20.22	19.19	17.46	19.26	20.2	24.18	24.13	24.27	30.21	27.91	36.99	37.96	44.27	40.63	41.06
RNV-1_NC_021565_	15.09	15.31	15.99	14.34	17.43	16.56	16.07	15.31	14.7	15.49	14.89	17.25	17.11	18.26	18.18	17.92	17.87	17.54	18.19	16.52	17.65	17.26	18.31	17.5	18.09	17.39	15.49	16.44	17.35	16.93	18.56	18.19	17.45	18.17	18.53	17.95	17.39	19.52	21.87	22.92	21.59	22.8	28.13	27.66	34.62	37.74	44.47	41.57	43.99
EbRV-1_AF356189_	16.93	16.44	15.78	16.29	18.27	14.26	14.1	15.97	15.47	14.13	13.49	17.37	16.47	16.55	17.36	17.24	16.02	17.43	17.09	16.67	16.55	17.27	17.52	16.83	16.22	19.04	17.77	18.81	17.77	18.17	17.69	17.51	18.12	17.16	17.67	18.23	17.29	18.62	21.19	24.52	23.47	24.73	27.68	27.88	31.74	29.57	31.72	31.5	30.24
EtRV-1_NC_026140_	15.15	15.62	17.67	15.77	18.5	14.22	14.05	14.72	16	14.51	15.11	16.43	15.82	14.97	16.48	17.73	16.88	18.06	16.5	17.49	16.62	15.6	17.84	16.67	17.29	16.42	16.59	17.93	16.59	17.68	17.16	17.68	16.14	17.05	18.14	16.64	15.71	18.87	21.9	26.16	24.97	24.96	26.73	25.89	32.39	30.45	29.48	29.21	31.04
EsRV-1_KU597305_	16.23	15.01	16.8	13.35	16.19	13.61	13.78	14.22	14.22	14.95	14.09	15.63	15.4	15.95	18.05	16.64	17.33	16.95	17.51	16.96	15.88	15.1	17.68	16.69	16.57	16.31	15.57	16.84	17.48	17.65	17.17	17.17	16.6	18.32	18.12	17.24	15.61	19.83	22.99	24.35	25.48	24.89	26.13	25.75	32.28	28.21	28.25	28.36	31.04
AnTV_KX148550_	11.15	12.82	12.74	10.57	11.49	10.04	10.22	13.96	13.8	12.44	15.58	12.5	12.4	12.67	12.09	12.15	13.31	14.53	13.43	13.75	13.22	14.71	13.49	11.56	12.64	12.23	13.11	12.96	12.87	14.04	13.65	12.82	12.91	12.58	12.13	10.67	13.55	13.88	13.07	13.36	13.93	13.16	15.43	14.55	14.01	13.14	14.61	12.4	13.85
CNV_NC_029312_	12.89	12.68	12.95	12.5	13.92	12.24	11.28	14.13	16.28	16.81	17	12.52	13.53	11.87	11.25	11.8	12.91	12.42	12.26	12.81	13.25	13.79	13.4	12.39	11.6	13.66	13.58	13.89	12.52	12.7	11.95	13.2	15.17	11.15	11.67	11.97	12.5	12.26	14.45	15.62	15.41	14.99	13.52	13.6	14.14	13.97	12.86	13.28	12.76
CYV_NC_027212_	15.52	15.6	12.92	12.47	14.12	11.36	11.16	15.27	16.95	17.01	17	14.74	14.29	13.86	11.18	14.02	13.66	12.37	12.01	13.49	13.31	14.7	13.04	13.9	12.4	14.47	13.05	16.21	14.74	13.6	12.13	13.81	15.84	13.58	13.87	13.47	14.17	13.25	15.87	14.19	15.4	15.4	15.03	14.74	16.5	14.43	13	14.08	14.66
SfTV1_MG546515_	13.57	10.7	13.16	12.26	12.47	9.96	10.15	15.56	15.94	14.99	15.12	12.61	13.35	13.45	10.56	12.38	12.79	12.02	12.83	13.69	13.47	14.19	14.15	11.99	11.17	12.68	12.87	12.54	12.03	12.6	13.02	12.44	14.41	12.76	13.05	12.21	13.27	12.92	14.66	13.97	13.48	13.88	14.66	14.94	15.15	11.94	12.68	13.08	13.98
SfTV2_MG546516_	13.83	11.34	14.34	13.04	12.77	10.13	10.52	14.31	14.84	16.93	17.7	13.14	12.36	12.09	11.23	12.39	12.73	11.88	12.3	12.97	12.22	14.89	11.59	11.48	13.03	11.9	10.96	12.73	13.45	14.44	12.82	13.02	14.47	15.55	13.4	12.18	13.35	12.48	15.05	12.69	14.39	13.29	13.21	14.15	13.33	12.34	13.36	11.78	12.68
PmLV_NC_029302_	13.04	11.55	12.92	12.98	14.47	14.51	14.71	16.7	16.88	16.49	17.46	12.92	13.67	14.1	11.87	13.32	12.44	12.68	13	12.84	14.33	13.46	13.25	12.31	13.95	13.51	13.33	14.24	13.72	14.67	14.31	12.64	13.29	12.62	13.54	13.95	13.36	15.52	14.03	14.74	15.24	14.91	14.98	15.73	15.28	16.61	16.27	17.54	16.55
GcV_DQ238861_	11.57	12.74	12.98	14.77	14.74	11.03	11.38	15.75	15.37	15.44	15.9	12.36	12.01	13.61	14.45	14.04	13.27	14.58	13.88	15.67	14.2	15.28	14.82	12.69	13.98	13.38	14.21	13.19	12.93	13.16	13.34	13.28	15.38	14.08	14.7	15.87	13.7	13.07	13.87	13.27	13.78	14.44	13.97	13.72	13.84	14.35	16.8	15.53	15.56
GlV_NC_003555_	11.45	12.15	12.98	14.96	15.34	10.68	11.03	15.92	15.54	15.27	16.32	12.21	12.01	13.45	13.79	13.88	13.43	14.26	13.88	15.83	14.2	15.28	14.65	12.85	14.31	13.88	14.55	13.19	12.93	13.62	13.67	13.42	15.55	14.24	14.7	15.54	14.03	13.44	14.21	13.1	13.78	14.26	14.13	13.22	14.01	14.68	16.64	15.53	15.4
[truncated: 13 more columns]

## Sheet: Tab-S7-CP
Table S7: Identities of amino acid sequences among putative CPs encoded by representative members of the family Totiviridae
	PeLV_NC_023983_	SSV-L_KC610514_	RPaTV2_NC_028481_	SCV-L-BC_U01060_	AnTV_KX148550_	RPaTV3_NC_028483_	XDV-L1A_JN997472_	RPaTV4_LC075489_	XDV-L1B_JN997473_	SCV-LA_NC_003745_	TAV-1_HQ158596_	RPaTV1a_NC_028480_	PsV5_KY207365_	CrTV5-ORF1	MaTV-1_NC_028044_	BRV-F_NC_009890_	PnVA_NC_029096_	TVV-1_TVU08999_	TVV-2_AF127178_	TVV-4_HQ607522_	TVV-3_AF325840_	LRV-1-1_M92355_	LRV-2-1_U32108_	EtRV-1_NC_026140_	EsRV-1_KU597305_	EbRV-1_AF356189_	MOV-1_NC_006367_	GARV-L1_NC_003876_	HMV-1-17_NC_005074_	AFSV-1_HE588147_	RNV-1_NC_021565_	HVV-190S_NC_003607_	TCV-1_NC_014823_	PMCLV_NC_029302_	PsV2_KY207362_	CrTV2-orf1	RPaTV5_NC_028485_	PsV3_KY207363_	CrTV4-orf1	PsV1_KY207361_	PaMV_KT222801_	CrTV3-orf1	RPaTV8_LC075493_	RPaTV7_NC_028488_	RPaTV6_NC_028486_	PpRV-2_LC376045_	CrTV1-orf1	IMNV_AY570982_	AsTV_EU715328_
PeLV_NC_023983_	100	11.93	10.73	9.73	20.31	10.87	11.35	12.39	13.11	12.06	12.59	11.9	12.14	10.62	13.62	14.66	14.38	10.05	13.83	14.45	12.26	11.24	12.65	10.25	10.36	12.11	11.35	10.21	11.28	11.73	12.46	11.14	11.82	11.9	9.21	8.12	8.2	8.79	8.82	8.38	7.59	9.24	7.36	9.75	9.89	13.1	10.78	9.35	9.81
SSV-L_KC610514_	11.93	100	22.73	21.29	12.99	12.46	13.5	14.64	14.31	16.72	16.36	17.7	17.47	16.81	13.03	18.38	18.15	6.33	9.46	4.76	9.27	7.22	7.34	9.2	6.23	6.55	7.2	8.08	7.41	10.61	8.61	6.32	9.02	8.75	12.34	13.92	11.97	15.36	14.05	15.34	14.01	14.92	12.78	16.13	15.91	10.49	7.17	8.09	10.57
RPaTV2_NC_028481_	10.73	22.73	100	25.75	10.61	13.93	13.62	12.98	13.57	17.22	17.77	15.35	15.07	11.94	15.27	14.9	15.31	7.24	9.46	7.09	6	6.98	8.27	9.38	8.27	8	9.06	9.23	7.17	11.28	9.16	9.02	8.3	7.39	13.81	13.43	12.93	16.48	14.94	13.11	11.94	13.75	12.59	15.79	13.26	10.26	8.37	9.15	7.44
SCV-L-BC_U01060_	9.73	21.29	25.75	100	9.89	11.06	10.95	13.68	13.36	15.95	16.58	14.12	15.37	14.38	12.29	13.04	13.44	9.55	8.81	6.18	5.88	6.25	6.67	6.87	7.75	8.09	7.89	6.56	7.12	7.42	7.58	5.97	6.46	5.35	12.3	13.92	10.82	14.57	11.92	11.33	13.92	11.94	10.29	12.38	13.11	11.62	10.19	10.25	7
AnTV_KX148550_	20.31	12.99	10.61	9.89	100	11.5	13.21	12.83	12.66	13.43	15.19	15.24	15.85	16.03	13.81	16.94	17.41	8.61	8.37	8.87	8.3	9.58	8.22	7.82	8.06	11.5	10.1	8.74	10.76	11	10.68	9	10.32	11.67	11.34	11.02	11.05	12.14	10.61	11.05	11.34	13.4	9.82	11.87	12.4	12.93	7.91	6.71	10.97
RPaTV3_NC_028483_	10.87	12.46	13.93	11.06	11.5	100	27.54	26.73	30.69	13.95	15.81	15.03	15.07	16.04	14.58	13.85	15.43	7.53	12.56	11.81	6.85	6.3	8.47	6.87	6.97	11.11	9.75	9.7	7.79	12.77	8.75	8.64	10.33	5.53	13.82	14.8	15.38	13.76	12.42	13.82	15.08	16.07	13.4	11.92	15.67	10.16	7.78	6.05	8.43
XDV-L1A_JN997472_	11.35	13.5	13.62	10.95	13.21	27.54	100	36.71	35.1	15.03	14.69	13.26	16.32	16.19	13.16	14.63	14.63	8.45	9.13	4.82	4.12	12.71	8.09	6.09	8.3	7.97	9.36	7.23	8.3	11.64	9.28	11.25	10.88	8.66	13.82	14.8	11.45	14.53	13.51	11.88	16.12	15.08	12.75	11.59	12	8	8.98	10.39	7.04
RPaTV4_LC075489_	12.39	14.64	12.98	13.68	12.83	26.73	36.71	100	44.36	16.09	17.32	14.33	15.01	15.66	12.07	15.54	17.27	6.99	7.73	7.97	6.12	9.32	9.36	7.79	8.26	9.96	9.79	10.59	9.92	12.45	10.08	9.96	12.5	10.34	17.05	14.75	15.44	18.18	14.48	15.13	14.75	14.71	14.66	14.52	13.95	8.31	11.67	8.57	6.18
XDV-L1B_JN997473_	13.11	14.31	13.57	13.36	12.66	30.69	35.1	44.36	100	15.77	18.74	14.01	14.06	16.77	11.02	14.1	14.42	8.39	9.09	7.57	8.16	9.32	7.66	7.36	9.5	8.37	11.49	8.9	7.44	9.44	9.24	9.54	9.58	10.34	13.11	12.79	13.09	14.48	14.48	12.83	13.11	12.42	12.7	11.22	12.29	7.31	10.12	11.43	8.99
SCV-LA_NC_003745_	12.06	16.72	17.22	15.95	13.43	13.95	15.03	16.09	15.77	100	39.12	23.72	26.39	25.98	16.88	26.82	26.35	8.22	8.72	8.47	8.91	7.38	9.5	10.29	9.06	8.49	8.2	11.89	6.75	9.84	10.08	9.56	10.4	8.79	16.89	19.54	18.33	18.52	19.19	14.85	17.43	15.79	15.74	18.6	15.72	8.23	11.28	9.33	8.26
TAV-1_HQ158596_	12.59	16.36	17.77	16.58	15.19	15.81	14.69	17.32	18.74	39.12	100	24.17	26.54	26.43	18.34	26.36	24.55	8.22	8.72	8.06	6.88	6.56	10.33	9.47	8.27	7.72	8.61	10.25	6.35	11.07	10.48	7.57	10.8	5.02	17.55	17.88	18	17.85	16.84	18.15	18.42	18.75	16.72	18.6	18.06	10.09	9.4	6.32	7.94
RPaTV1a_NC_028480_	11.9	17.7	15.35	14.12	15.24	15.03	13.26	14.33	14.01	23.72	24.17	100	37.15	40.23	26.88	31.94	29.25	4.73	11.31	6.4	7.66	5.56	7.6	8.13	8.59	9.06	12.5	9.68	9.45	11.2	13.04	11.02	12.6	9.62	14.71	17.32	18.54	19	17	16.34	15.31	16.61	13.64	17.76	14.24	11	7.43	8.99	11.01
PsV5_KY207365_	12.14	17.47	15.07	15.37	15.85	15.07	16.32	15.01	14.06	26.39	26.54	37.15	100	45.99	29.25	36.05	37.1	8.67	11.21	8.3	8.76	5.95	7.6	9.72	8.17	7.55	11.24	11.24	9.02	12.8	12.65	11.76	12.16	8.37	16.94	18.24	15.18	18.27	17.28	17.59	16.56	15.58	12.62	18.03	15.51	11.22	9.23	10.45	10.98
CrTV5-ORF1	10.62	16.81	11.94	14.38	16.03	16.04	16.19	15.66	16.77	25.98	26.43	40.23	45.99	100	26	33.58	34.21	10.67	8.07	7.94	8	7.14	9.6	7.69	7.78	7.17	9.64	10.04	8.63	10	13.04	12.55	12.94	12.13	17.26	17.26	15.51	22.59	20.6	17.92	18.18	17.86	14.24	17.7	17.49	10.26	9.23	11.19	11.57
MaTV-1_NC_028044_	13.62	13.03	15.27	12.29	13.81	14.58	13.16	12.07	11.02	16.88	18.34	26.88	29.25	26	100	31.16	36.52	7.41	11.29	8.33	10.17	10.38	7.69	9.9	9.82	14.29	9.9	10.58	11.61	11.65	13.08	14.68	13.76	7.26	16.09	16.09	20	21.69	20.48	21.59	20.45	15.91	13.64	22.73	23.81	15.3	8.09	9.29	8.7
BRV-F_NC_009890_	14.66	18.38	14.9	13.04	16.94	13.85	14.63	15.54	14.1	26.82	26.36	31.94	36.05	33.58	31.16	100	39.54	8.24	10.98	7.14	9.25	10.45	10.53	9.29	10.69	9.83	12.95	9.29	10.76	12.28	12.24	11.15	13.59	10.03	15.36	19.75	17.24	18.99	16.83	15.58	18.01	18.38	11.53	19.62	16.77	10.72	7.28	10.09	9.49
PnVA_NC_029096_	14.38	18.15	15.31	13.44	17.41	15.43	14.63	17.27	14.42	26.35	24.55	29.25	37.1	34.21	36.52	39.54	100	5.65	10.12	5.92	7.37	9.68	11.91	10.22	9.15	10.96	12.32	9.09	10.28	13.72	12.14	11.35	13.12	13.07	15.65	17.89	19.17	17.74	18.45	17.14	17.41	16.83	12.7	17.42	15.16	10.87	7.48	8	10.69
TVV-1_TVU08999_	10.05	6.33	7.24	9.55	8.61	7.53	8.45	6.99	8.39	8.22	8.22	4.73	8.67	10.67	7.41	8.24	5.65	100	22.62	22.44	19.65	8.74	8.39	8.99	9.32	7.72	7.04	7.59	10.17	9.03	9.76	9.72	9.44	10.71	11.48	12.02	11.48	9.84	9.34	8.74	9.34	7.69	9.84	12.57	8.74	10	9.43	9.94	9.24
TVV-2_AF127178_	13.83	9.46	9.46	8.81	8.37	12.56	9.13	7.73	9.09	8.72	8.72	11.31	11.21	8.07	11.29	10.98	10.12	22.62	100	31.51	33.28	13.06	11.73	11.7	12.64	9.14	10.45	9.37	9.56	10.99	12.46	12.68	11.33	11.89	11.95	11.95	11.6	11.2	10.04	10.76	11.2	12	8.37	13.15	9.16	9.95	8.15	12.09	10.71
TVV-4_HQ607522_	14.45	4.76	7.09	6.18	8.87	11.81	4.82	7.97	7.57	8.47	8.06	6.4	8.3	7.94	8.33	7.14	5.92	22.44	31.51	100	49.86	8.24	7.84	10.71	13.49	9.65	12.37	10.34	11.08	11.35	11.67	12.66	9.55	11.6	8.6	12.19	9.35	9.71	11.91	10.04	11.51	10.07	9.68	8.24	12.19	8.25	11.85	12.28	10.05
TVV-3_AF325840_	12.26	9.27	6	5.88	8.3	6.85	4.12	6.12	8.16	8.91	6.88	7.66	8.76	8	10.17	9.25	7.37	19.65	33.28	49.86	100	7.99	6.57	11.46	10.16	9.55	11.51	9.09	11.38	11.26	10.24	11.26	8.63	13.18	8.15	10	11.9	10.78	13.06	15.19	12.64	13.38	10.37	10.74	10.74	9.56	8.84	13.45	11
LRV-1-1_M92355_	11.24	7.22	6.98	6.25	9.58	6.3	12.71	9.32	9.32	7.38	6.56	5.56	5.95	7.14	10.38	10.45	9.68	8.74	13.06	8.24	7.99	100	36.88	19.03	18.06	20.27	17.58	18	16.29	18.4	17.97	18	20.03	12.47	15.87	12.18	9.23	15.5	12.22	8.86	13.33	11.85	9.56	11.52	10.41	11.32	8.86	11.52	9.32
LRV-2-1_U32108_	12.65	7.34	8.27	6.67	8.22	8.47	8.09	9.36	7.66	9.5	10.33	7.6	7.6	9.6	7.69	10.53	11.91	8.39	11.73	7.84	6.57	36.88	100	19.66	18.67	20.53	20.87	20.28	18.03	20.66	19.59	18.65	21.47	13.42	10.82	9.33	10.45	11.94	11.61	10.07	10.86	10.86	9.67	11.28	9.77	10.31	9.63	10.71	9.87
EtRV-1_NC_026140_	10.25	9.2	9.38	6.87	7.82	6.87	6.09	7.79	7.36	10.29	9.47	8.13	9.72	7.69	9.9	9.29	10.22	8.99	11.7	10.71	11.46	19.03	19.66	100	44.07	24.47	24.27	25.72	23.1	22.25	25.5	25.32	26.81	12.89	13.01	10.78	10.78	13.38	14.93	10.41	13.06	13.81	11.11	10.49	11.61	12.61	10.86	9.95	13
EsRV-1_KU597305_	10.36	6.23	8.27	7.75	8.06	6.97	8.3	8.26	9.5	9.06	8.27	8.59	8.17	7.78	9.82	10.69	9.15	9.32	12.64	13.49	10.16	18.06	18.67	44.07	100	25.07	24.07	27.85	24.69	23.82	24.72	25.95	25.04	14.4	12.69	11.57	11.94	10.07	11.99	9.33	11.24	11.99	9.29	10.53	10.9	13.62	11.34	10.95	13.37
EbRV-1_AF356189_	12.11	6.55	8	8.09	11.5	11.11	7.97	9.96	8.37	8.49	7.72	9.06	7.55	7.17	14.29	9.83	10.96	7.72	9.14	9.65	9.55	20.27	20.53	24.47	25.07	100	21.93	26.45	25.81	25.18	24.68	25.47	25.22	14.01	10.75	13.98	10.39	11.83	9.71	10.04	14.03	12.95	10.36	9.75	11.55	9.4	11.46	9.26	7.91
MOV-1_NC_006367_	11.35	7.2	9.06	7.89	10.1	9.75	9.36	9.79	11.49	8.2	8.61	12.5	11.24	9.64	9.9	12.95	12.32	7.04	10.45	12.37	11.51	17.58	20.87	24.27	24.07	21.93	100	30.85	31.1	35.14	36.78	37.66	37.2	11.78	10.57	10.57	11.32	9.81	10.61	10.19	11.36	13.64	11.28	12.17	12.55	13.12	12.23	10.35	12.05
GARV-L1_NC_003876_	10.21	8.08	9.23	6.56	8.74	9.7	7.23	10.59	8.9	11.89	10.25	9.68	11.24	10.04	10.58	9.29	9.09	7.59	9.37	10.34	9.09	18	20.28	25.72	27.85	26.45	30.85	100	32.52	36.06	37.77	37.37	37.35	14.59	13.11	15.36	10.49	11.24	10.53	11.61	13.16	15.04	11.57	11.7	10.19	12.78	13.74	10.22	11.96
HMV-1-17_NC_005074_	11.28	7.41	7.17	7.12	10.76	7.79	8.3	9.92	7.44	6.75	6.35	9.45	9.02	8.63	11.61	10.76	10.28	10.17	9.56	11.08	11.38	16.29	18.03	23.1	24.69	25.81	31.1	32.52	100	39.75	38.84	40.08	39.78	15.03	10	12.31	11.92	10.38	8.11	11.15	12.74	11.2	11.49	12.4	13.18	10.78	10.33	10.07	11.14
AFSV-1_HE588147_	11.73	10.61	11.28	7.42	11	12.77	11.64	12.45	9.44	9.84	11.07	11.2	12.8	10	11.65	12.28	13.72	9.03	10.99	11.35	11.26	18.4	20.66	22.25	23.82	25.18	35.14	36.06	39.75	100	52.66	52.72	57.06	13.17	12.21	14.12	12.6	11.83	11.88	13.36	17.24	15.71	11.41	12.31	12.69	12.47	12.78	11.7	12.93
RNV-1_NC_021565_	12.46	8.61	9.16	7.58	10.68	8.75	9.28	10.08	9.24	10.08	10.48	13.04	12.65	13.04	13.08	12.24	12.14	9.76	12.46	11.67	10.24	17.97	19.59	25.5	24.72	24.68	36.78	37.77	38.84	52.66	100	57.39	57.05	14.29	11.07	13.74	12.21	10.69	11.49	10.69	12.26	12.64	11.79	12.69	14.23	12.33	11.73	11.34	13.4
HVV-190S_NC_003607_	11.14	6.32	9.02	5.97	9	8.64	11.25	9.96	9.54	9.56	7.57	11.02	11.76	12.55	14.68	11.15	11.35	9.72	12.68	12.66	11.26	18	18.65	25.32	25.95	25.47	37.66	37.37	40.08	52.72	57.39	100	62.04	14.52	9.89	12.55	9.51	10.65	10.69	10.27	11.83	12.21	11.36	8.81	11.88	12.69	11.08	12	11.51
TCV-1_NC_014823_	11.82	9.02	8.3	6.46	10.32	10.33	10.88	12.5	9.58	10.4	10.8	12.6	12.16	12.94	13.76	13.59	13.12	9.44	11.33	9.55	8.63	20.03	21.47	26.81	25.04	25.22	37.2	37.35	39.78	57.06	57.05	62.04	100	12.94	11.79	13.31	10.27	10.65	11.83	12.55	14.89	13.36	11.74	10.73	14.56	12.31	10.58	8.75	14.36
PMCLV_NC_029302_	11.9	8.75	7.39	5.35	11.67	5.53	8.66	10.34	10.34	8.79	5.02	9.62	8.37	12.13	7.26	10.03	13.07	10.71	11.89	11.6	13.18	12.47	13.42	12.89	14.4	14.01	11.78	14.59	15.03	13.17	14.29	14.52	12.94	100	14.87	12.65	13.58	14.45	13.08	15.54	12.13	16.42	12.69	14.07	14.84	17.22	16.67	14.8	17.41
PsV2_KY207362_	9.21	12.34	13.81	12.3	11.34	13.82	13.82	17.05	13.11	16.89	17.55	14.71	16.94	17.26	16.09	15.36	15.65	11.48	11.95	8.6	8.15	15.87	10.82	13.01	12.69	10.75	10.57	13.11	10	12.21	11.07	9.89	11.79	14.87	100	35.11	28.73	33.75	32.91	32.56	31.27	32.71	24.09	29.77	25.85	14	11.07	10.39	10.1
CrTV2-orf1	8.12	13.92	13.43	13.92	11.02	14.8	14.8	14.75	12.79	19.54	17.88	17.32	18.24	17.26	16.09	19.75	17.89	12.02	11.95	12.19	10	12.18	9.33	10.78	11.57	13.98	10.57	15.36	12.31	14.12	13.74	12.55	13.31	12.65	35.11	100	31.13	33.93	32.26	33.75	31.52	32.24	23.37	28.83	25.58	9.22	10.46	11.44	10.46
RPaTV5_NC_028485_	8.2	11.97	12.93	10.82	11.05	15.38	11.45	15.44	13.09	18.33	18	18.54	15.18	15.51	20	17.24	19.17	11.48	11.6	9.35	11.9	9.23	10.45	10.78	11.94	10.39	11.32	10.49	11.92	12.6	12.21	9.51	10.27	13.58	28.73	31.13	100	30.31	30.4	33.37	28.36	33.33	22.08	28.1	26.62	11.21	9.18	8.85	8.85
PsV3_KY207363_	8.79	15.36	16.48	14.57	12.14	13.76	14.53	18.18	14.48	18.52	17.85	19	18.27	22.59	21.69	18.99	17.74	9.84	11.2	9.71	10.78	15.5	11.94	13.38	10.07	11.83	9.81	11.24	10.38	11.83	10.69	10.65	10.65	14.45	33.75	33.93	30.31	100	45.5	34.33	30.19	34.67	22.89	27.27	25.06	11.3	12.54	13.83	11.59
CrTV4-orf1	8.82	14.05	14.94	11.92	10.61	12.42	13.51	14.48	14.48	19.19	16.84	17	17.28	20.6	20.48	16.83	18.45	9.34	10.04	11.91	13.06	12.22	11.61	14.93	11.99	9.71	10.61	10.53	8.11	11.88	11.49	10.69	11.83	13.08	32.91	32.26	30.4	45.5	100	33.12	31.15	33.8	23.33	27.07	28.09	10.5	12.25	12	10.15
PsV1_KY207361_	8.38	15.34	13.11	11.33	11.05	13.82	11.88	15.13	12.83	14.85	18.15	16.34	17.59	17.92	21.59	15.58	17.14	8.74	10.76	10.04	15.19	8.86	10.07	10.41	9.33	10.04	10.19	11.61	11.15	13.36	10.69	10.27	12.55	15.54	32.56	33.75	33.37	34.33	33.12	100	33.87	34.53	25.03	28.68	27.47	12.39	8.88	11.18	12.27
PaMV_KT222801_	7.59	14.01	11.94	13.92	11.34	15.08	16.12	14.75	13.11	17.43	18.42	15.31	16.56	18.18	20.45	18.01	17.41	9.34	11.2	11.51	12.64	13.33	10.86	13.06	11.24	14.03	11.36	13.16	12.74	17.24	12.26	11.83	14.89	12.13	31.27	31.52	28.36	30.19	31.15	33.87	100	40.74	25.54	28.01	26.62	13.78	9.93	9.46	10.67
CrTV3-orf1	9.24	14.92	13.75	11.94	13.4	16.07	15.08	14.71	12.42	15.79	18.75	16.61	15.58	17.86	15.91	18.38	16.83	7.69	12	10.07	13.38	11.85	10.86	13.81	11.99	12.95	13.64	15.04	11.2	15.71	12.64	12.21	13.36	16.42	32.71	32.24	33.33	34.67	33.8	34.53	40.74	100	25.13	29.85	26.36	11.94	10.81	9.9	9.83
RPaTV8_LC075493_	7.36	12.78	12.59	10.29	9.82	13.4	12.75	14.66	12.7	15.74	16.72	13.64	12.62	14.24	13.64	11.53	12.7	9.84	8.37	9.68	10.37	9.56	9.67	11.11	9.29	10.36	11.28	11.57	11.49	11.41	11.79	11.36	11.74	12.69	24.09	23.37	22.08	22.89	23.33	25.03	25.54	25.13	100	28.16	26.2	9.62	9.93	10.13	10.58
RPaTV7_NC_028488_	9.75	16.13	15.79	12.38	11.87	11.92	11.59	14.52	11.22	18.6	18.6	17.76	18.03	17.7	22.73	19.62	17.42	12.57	13.15	8.24	10.74	11.52	11.28	10.49	10.53	9.75	12.17	11.7	12.4	12.31	12.69	8.81	10.73	14.07	29.77	28.83	28.1	27.27	27.07	28.68	28.01	29.85	28.16	100	32.91	9.47	10.4	9.86	11.09
RPaTV6_NC_028486_	9.89	15.91	13.26	13.11	12.4	15.67	12	13.95	12.29	15.72	18.06	14.24	15.51	17.49	23.81	16.77	15.16	8.74	9.16	12.19	10.74	10.41	9.77	11.61	10.9	11.55	12.55	10.19	13.18	12.69	14.23	11.88	14.56	14.84	25.85	25.58	26.62	25.06	28.09	27.47	26.62	26.36	26.2	32.91	100	11.5	10.7	11.45	9.05
PpRV-2_LC376045_	13.1	10.49	10.26	11.62	12.93	10.16	8	8.31	7.31	8.23	10.09	11	11.22	10.26	15.3	10.72	10.87	10	9.95	8.25	9.56	11.32	10.31	12.61	13.62	9.4	13.12	12.78	10.78	12.47	12.33	12.69	12.31	17.22	14	9.22	11.21	11.3	10.5	12.39	13.78	11.94	9.62	9.47	11.5	100	21.87	12.81	11.85
CrTV1-orf1	10.78	7.17	8.37	10.19	7.91	7.78	8.98	11.67	10.12	11.28	9.4	7.43	9.23	9.23	8.09	7.28	7.48	9.43	8.15	11.85	8.84	8.86	9.63	10.86	11.34	11.46	12.23	13.74	10.33	12.78	11.73	11.08	10.58	16.67	11.07	10.46	9.18	12.54	12.25	8.88	9.93	10.81	9.93	10.4	10.7	21.87	100	11.86	12.66
IMNV_AY570982_	9.35	8.09	9.15	10.25	6.71	6.05	10.39	8.57	11.43	9.33	6.32	8.99	10.45	11.19	9.29	10.09	8	9.94	12.09	12.28	13.45	11.52	10.71	9.95	10.95	9.26	10.35	10.22	10.07	11.7	11.34	12	8.75	14.8	10.39	11.44	8.85	13.83	12	11.18	9.46	9.9	10.13	9.86	11.45	12.81	11.86	100	27.77
AsTV_EU715328_	9.81	10.57	7.44	7	10.97	8.43	7.04	6.18	8.99	8.26	7.94	11.01	10.98	11.57	8.7	9.49	10.69	9.24	10.71	10.05	11	9.32	9.87	13	13.37	7.91	12.05	11.96	11.14	12.93	13.4	11.51	14.36	17.41	10.1	10.46	8.85	11.59	10.15	12.27	10.67	9.83	10.58	11.09	9.05	11.85	12.66	27.77	100
DTV_GQ342961_	11.85	9.33	8.43	8	12	10	8.6	6.86	8.57	9.61	9.88	12.12	12.39	12.08	10.4	13.28	11.11	12.74	11.9	12.33	12.75	8.54	9.84	12.38	13.17	9.55	11.65	9.64	12.75	13.68	13.49	12.37	11.76	16.67	9.09	11.09	10.08	10.35	11.21	11.66	9.62	11.51	9.34	10.23	9.89	11.89	12.5	29.11	45.06
ORV_AB555544_	12.89	9.43	8.08	8.12	10.92	10.08	7.02	7.28	7.84	8.53	8.8	10.68	10.95	10.95	8.57	13.04	9.39	12.38	12.59	12.3	10.97	10.3	11.14	12.13	13.38	6.94	11.62	13.45	13.25	12.11	12.47	13.89	11.25	15.26	10.58	11.91	8.92	11.84	10.21	11.09	10.08	11.93	12.63	11.11	10.17	11.25	11.9	29.45	45.15
DcaRV-17B_BAU79518_	8.8	7.79	7.52	9.9	11.02	5.75	5.83	9.03	6.77	6.51	6.84	8.04	6.75	6.75	8.02	6.67	7.63	9.91	8.03	6.73	8.37	13.54	12.5	9.73	11.8	9.57	11.4	12.24	9.96	11.61	10.57	12.39	10.7	11.98	12.6	10.34	9.95	9.4	10.19	12.66	11.05	12.13	9.76	11.59	13.1	15.52	12.82	12.79	14.55
DcaRV-17A_BAU79516_	9.54	7.79	6.86	9.58	10.48	5.43	5.83	9.03	6.77	6.51	7.17	7.4	6.75	6.75	8.64	7.2	7.9	10.53	8.27	7.42	8.13	13.32	12.26	9.73	12.47	9.11	10.7	11.76	9.29	11.14	10.34	11.7	10	12.18	12.34	9.81	10.47	9.4	10.46	12.4	11.32	11.86	9.76	11.86	13.37	16.12	13.01	12.46	14.7
RPaTV9_NC_028490_	11.93	5.67	7.12	9.52	11.93	5.37	6.84	8.92	9.15	9.22	9.67	8.94	8.39	7.93	10.45	8.23	9.41	11.97	13.17	9.63	10.1	10.48	8.93	9.11	11.66	9.33	9.57	12.1	9.25	10.42	10.38	11.04	8.8	13.16	11.15	13.25	10.92	12.33	11.15	10.77	11.59	11.59	10.49	13.22	10.54	14.44	12.39	12.25	15.13
GcV_DQ238861_	10.94	6.67	7.69	6.8	8.95	8.64	7.92	6.25	7.92	5.44	7.11	8.64	5.33	7.79	10.9	7.61	8.12	7.95	9.56	9.09	9.29	11.44	6.67	8.17	8.7	7.88	9.3	8.89	9.52	8.94	8.99	9.5	8.99	12.87	9.48	12.25	9.74	8.44	10.53	10.56	8.7	11.04	8.16	9.4	9.56	14.21	11.62	13.09	13.23
GlV_NC_003555_	10.91	7.06	8.5	6.4	8.31	9.05	7.5	7.08	8.33	5.44	7.11	9.47	6.15	8.61	10.9	8.33	8.86	8.28	9.82	9.09	8.74	12.77	8.03	8.15	8.67	8.4	8.43	9.42	9.76	8.91	8.96	9.47	9.8	14.02	9.51	12.29	9.77	8.14	10.56	10.6	9.06	11.74	8.19	9.09	9.59	13.99	11.41	11.91	12.35
UmV-H1_NC_003823_	10.77	7.37	10.14	10.7	11.36	8.9	9.55	12.4	11.08	10.5	8.9	11.23	9.57	7.47	7.05	8.85	9.86	11.24	11.17	12.62	13.95	10.8	12.36	9.63	11.54	10.82	10.13	11	11.34	11.45	11.8	10.82	10.27	14.84	13.97	13.42	11.94	12.06	11.74	12.71	10.27	13.04	12.21	14.31	11.83	15.45	14.26	12.46	13.07
HTLV-6_APG75977_	8.25	11.32	6.25	8.89	10.68	13.21	11.32	7.55	9.43	9.09	4.55	11.11	11.11	8.89	4.88	9.09	6.82	#NAME?	5.56	4.76	16.67	28.57	0	0	0	5.26	12.5	7.14	0	0	12.5	0	0	18.75	13.71	10.48	8.2	11.57	9.92	13.93	14.75	14.75	11.67	11.76	13.04	10.13	8.33	4	9.09
CYV_NC_027212_	8.99	6.49	7.24	7.98	9.6	6.38	8.62	6.75	7.36	9.17	7.62	9.88	9.26	8.64	9.17	8.98	9.33	5.71	10.2	10.12	10.46	9.34	9.35	10.59	12.14	9.83	11.08	11.69	10.38	10.69	10.7	9.25	10.53	13.3	9.94	9.14	10.86	12.25	9.2	10.37	10.12	11.75	9.43	9.48	11.53	11.3	11.09	10.4	11.65
CNV_NC_029312_	9.89	6.85	6.92	6.79	11.88	7.34	7.43	6.79	8.02	7.69	8.59	9.66	8.39	10.56	7.87	9.06	10.26	9.39	11.66	9.25	9.23	8.59	9.87	11.75	10.87	11.25	12.47	12.53	12.02	10.85	12.12	10.4	11.62	13.99	12.65	8.55	8.88	10.03	8.63	8.36	10.48	11.87	9.79	10.15	11.68	13.87	12.64	10	10.62
SfTV2_MG546516_	10.45	9.94	6.08	6.46	8.66	9.09	6.75	5.5	7.34	8.81	7.29	7.29	6.99	9.12	7.24	6.5	8.22	9.36	8.97	10.24	10.98	8.11	9.44	11.14	8.62	11.22	9.04	10.38	7.04	11.03	9.92	9.87	10.41	14.35	11.53	8.54	12.34	12.56	10.13	12.18	11.96	11.62	10.1	12.28	11.37	13.96	12.94	14.1	11.63
SfTV1_MG546515_	11.49	6.4	6.43	5.48	9.25	8.2	9.58	10.19	10.19	10.44	7.26	10.19	9.24	11.15	9.05	6.87	9.55	7.38	8.86	8.52	8.93	9.44	8.35	8.23	7.64	12.35	10.37	10.89	8.86	10	10.98	10.24	10.64	11.42	12.33	10.47	12.09	12.05	10.77	10	10.56	11.29	9.47	10.06	8.47	11.76	11.36	11.07	11.44
[truncated: 13 more columns]
